# Supplementary material for: Hydroxyapatite nanoparticles as novel low-refractive index additives for the long-term UV-photoprotection of transparent composite materials
Source: Royal Society of Chemistry journal article supplement (doi:10.1039/b912116a), 2009-01-01
Supplement: b912116a.pdf [file b912116a.pdf]

**Supplementary Information – Further Experimental Details:**

Hydroxyapatite Nanoparticles as Novel Low-Refractive Index Additives for the Long-Term UV-Photoprotection of Transparent Composite Materials

Dietmar Holzmann, Dieter Holzinger, Günter Hesser, Thomas Schmidt  
and Günther Knör \*

**Photocatalytic Activity Tests**

The photo-catalytic activity of the nanoparticles was assessed and compared by measuring the degradation-rate of an organic substrate molecule under UV-irradiation. To avoid interpretation problems arising from direct photolysis of the substrate, which is sometimes the case with commonly applied tests using coloured dye molecules as an indicator for the determination of photocatalytic activity [\*], a colourless organic molecule (perchloroethylene, PER, C<sub>2</sub>Cl<sub>4</sub>) was used as a test substrate. Instead of the typically used dyes (e.g. methylene blue), which absorb light in the region of the semiconductor bandgap, the organic substance PER (absorbance < 280 nm) was not directly irradiated in our tests. Depending on the type of catalyst and the duration of the UV-light exposure, different values of hydrochloric acid were built according to the following idealized stoichiometry:

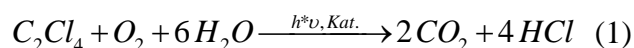

Therefore, the consumed Volume of 0.01M NaOH, for the titration of the HCl was recorded.

To figure out the activity of the different nanoparticles it was necessary to draw a graph (see

Fig. S1 below) with  $-\ln\left(\frac{C_{0,PER} - C_{PER}}{C_{0,PER}}\right)$  versus the duration of the UV- light exposure.

From the slope of the plots, the half-life-times of the substrates were calculated, which is a direct measure for evaluating destructive processes under irradiation. Furthermore, the

amount of degraded PER is an indication of the photocatalytic activity of the additive materials:

| <i>Material</i>       | $\tau_{1/2}$ [min] | <i>Degraded PER [%]</i> |
|-----------------------|--------------------|-------------------------|
| <i>Degussa P-25</i>   | 248                | 21.05                   |
| <i>Hydroxyapatite</i> | $7 \cdot 10^{15}$  | 0.19                    |
| <i>DLS 210</i>        | 1250               | 2.88                    |

This test figured out, that there is no undesired photocatalytic effect caused by hydroxyapatite.

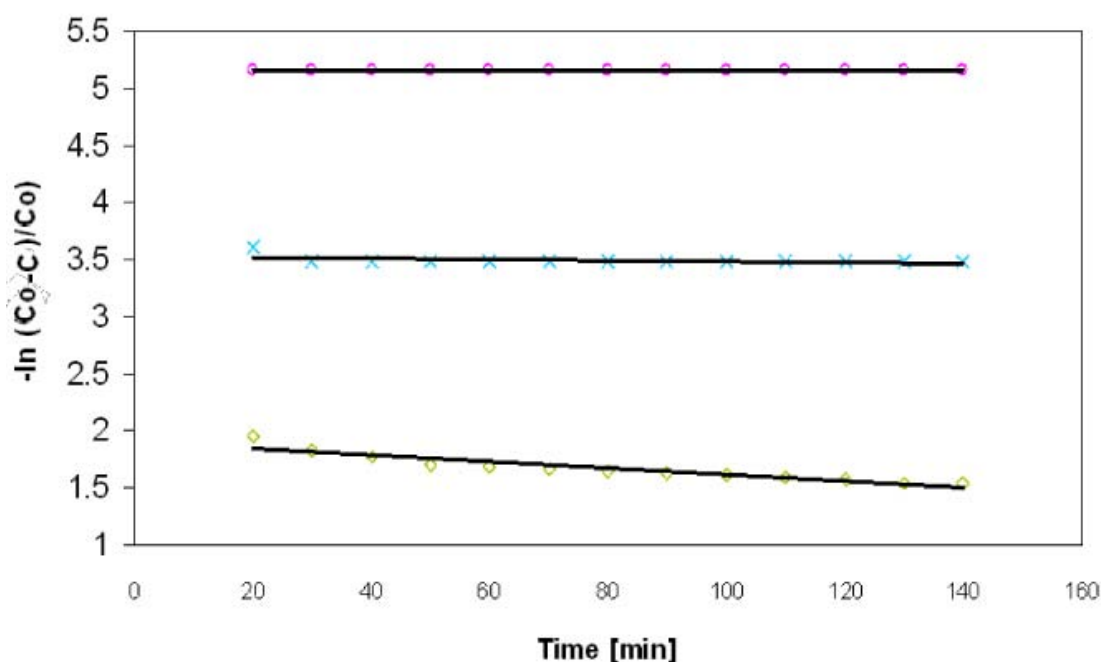

**Figure S1.** Photocatalytic degradation of perchlorethylene (PER) in the presence of inorganic UV-absorbers. The plot at the bottom shows Degussa P-25 (reference-substance, 25% Rutile, 75% Anatase). The graph above shows DLS 210-particles (a Rutile-based UV-light-stabilizer from DuPont) and the graph on the top the Hydroxyapatite-nanoparticles.

[\*] X. Yan, T. Ohno, K. Nishijima, R. Abe, B. Ohtani, "Is methylene blue an appropriate substrate for a photocatalytic activity test? A study with visible-light responsive titania", *Chemical Physics Letters*, **2006**, 429, 606.

## Particle Distribution Curve

The size distribution profile of the hydroxyapatite particles obtained from high-speed disk-centrifuge measurements is shown in the plot below (Peaks at 64nm and 369 nm):

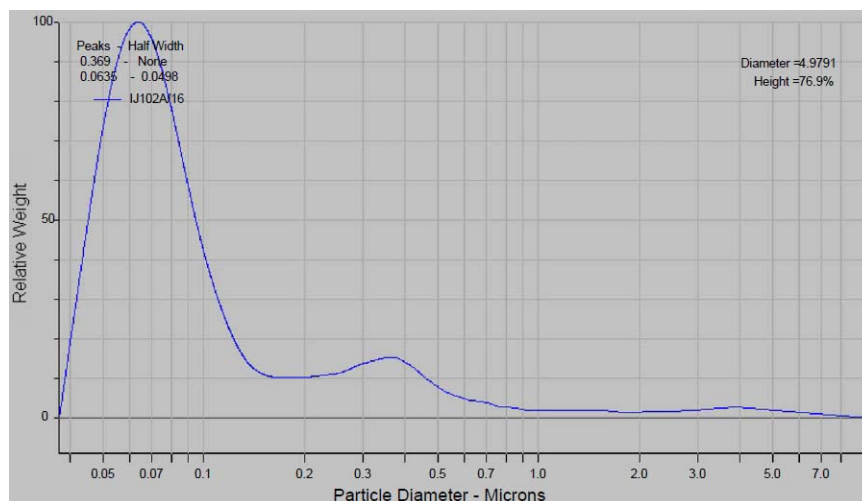

## Molecular Weight and $T_G$ of the Polyester Samples

For a hydroxyapatite content of 3-5%, the  $T_G$ -values of the materials were measured as 68 °C (see table below). For materials with the optimum content of 3% of additives, a molecular weight distribution plot (GPC-measurement indicating a MW of 7160 Daltons for polyester with 3% nanoparticle content) is also shown below:

| Particle       | Particle content [%] | SZ   | OHZ | $\eta_{200}$ [Pa.s] | $T_G$ [°C] |
|----------------|----------------------|------|-----|---------------------|------------|
| Reference      | -                    | 33.7 | 2.3 | 3.23                | 66.0       |
| Hydroxyapatite | 3                    | 33.4 | 2.6 | 3.17                | 67.7       |
| Hydroxyapatite | 5                    | 28.7 | 3.2 | 3.79                | 67.7       |

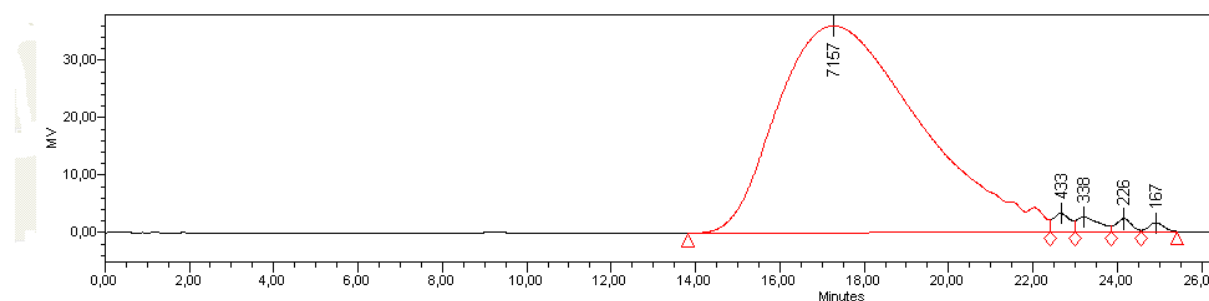

| Name | Retention Time (min) | Area ( $\mu V \cdot sec$ ) | Mn (Daltons) | Mw (Daltons) | MP (Daltons) | Mv (Daltons) | Mz (Daltons) | Mz+1 (Daltons) | Polydispersity |
|------|----------------------|----------------------------|--------------|--------------|--------------|--------------|--------------|----------------|----------------|
| 1    | Peak3                | 17,274                     | 8435232      | 3369         | 7061         | 7157         | 11506        | 15637          | 2,095715       |
| 2    |                      | 22,663                     | 90111        |              |              | 433          |              |                |                |
| 3    | Peak2                | 23,210                     | 92993        | 315          | 319          | 338          | 322          | 325            | 1,010091       |
| 4    |                      | 24,156                     | 57115        |              |              | 226          |              |                |                |
| 5    |                      | 24,912                     | 37436        |              |              | 167          |              |                |                |

**Effect of nanoparticle content on photostability:**

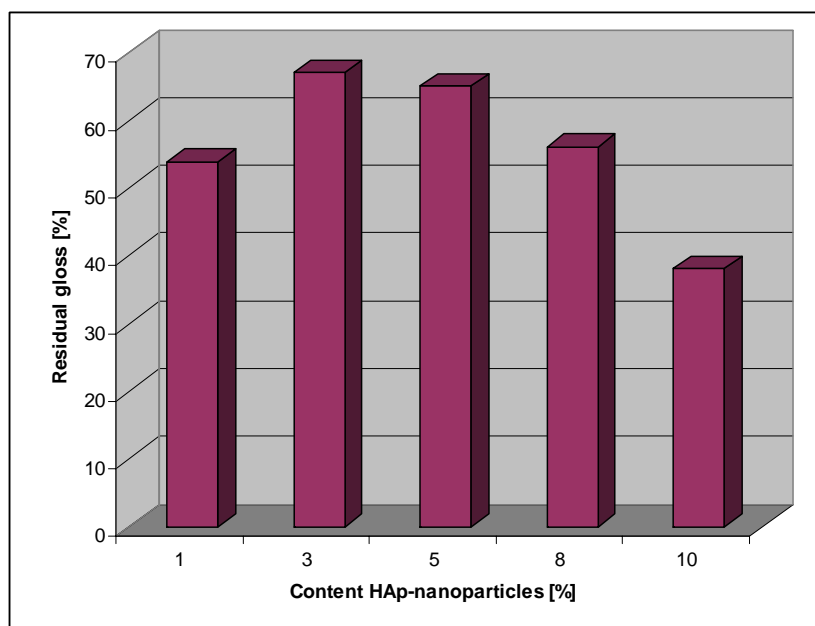

Optimum range of protection (maximum residual gloss after exposure) in the range of 3-5% of hydroxyapatite added.
